# Supplementary material for: Different Dose of Sucrose Consumption Divergently Influences Gut Microbiota and PPAR-γ/MAPK/NF-κB Pathway in DSS-Induced Colitis Mice
Source: MDPI journal article supplement (doi:10.3390/nu14132765), 2022-07-04
Supplement: s1 [file s1]

## **Supporting Information**

### **Divergently Regulation of Different Dose Sucrose Consumption on Gut Microbiota and PPAR- $\gamma$ /MAPK/NF- $\kappa$ B Pathway in DSS-Induced Colitis Mice**

#### **List of content**

**Supplementary Table S1.** Disease Activity Index Score

**Supplementary Table S2.** Sequence of the primers used in this study [sequence 5'-3']

**Supplementary Table S1.** Disease Activity Index Score

| Disease Activity Index Score |                                |                   |                 |
|------------------------------|--------------------------------|-------------------|-----------------|
| score                        | Rectal bleeding                | Stool consistency | Weight loss (%) |
| 0                            | none                           | normal            | 0               |
| 1                            | occult blood negative          | soft but formed   | 1-5             |
| 2                            | occult blood positive slightly | loose             | 6-10            |
| 3                            | occult blood positive          | mild diarrhea     | 11-15           |
| 4                            | gross bleeding                 | severe diarrhea   | > 15            |

The final macroscopic score for each animal is the average of these three separate scores.

**Supplementary Table S2.** Sequence of the primers used in this study [sequence 5'-3']

| Gene           | Forward                    | Reverse                    |
|----------------|----------------------------|----------------------------|
| $\beta$ -actin | CTACCTCATGAAGATCCTGACC     | CACAGCTTCTCTTTGATGTCAC     |
| IL-6           | CTCCCAACAGACCTGTCTATAC     | CCATTGCACAACCTCTTTTCTCA    |
| TNF- $\alpha$  | ATGTCTCAGCCTCTTCTCATTC     | GCTTGTCACTCGAATTTTGAGA     |
| IL-1 $\beta$   | AAGGGCTGCTTCCAAACCTTTGAC   | TGCCTGAAGCTCTTGTTGATGTGC   |
| ZO-1           | CTGGTGAAGTCTCGGAAAAATG     | CTGGTGAAGTCTCGGAAAAATG     |
| Occludin       | ACG GAC CCT GAC CAC TAT GA | TCA GCA GCA GCC ATG TAC TC |
| Claudin-1      | AGATACAGTGCAAAGTCTTCGA     | CAGGATGCCAATTACCATCAAG     |
| PPAR- $\gamma$ | CCAAGAATACCAAAGTGCGATC     | TCACAAGCATGAACTCCATAGT     |
